# Supplementary material for: CRISPR/Cas9-generated p47phox-deficient cell line for Chronic Granulomatous Disease gene therapy vector development
Source: Sci Rep. 2017 Mar 13;7:44187. doi: 10.1038/srep44187 (PMC5347011; doi:10.1038/srep44187)
Supplement: Supplementary Information [file srep44187-s1.pdf]

## **Supplementary Information**

CRISPR/Cas9-generated p47phox-deficient cell line for  
Chronic Granulomatous Disease gene therapy vector development

### **Authors**

Dominik Wrona<sup>1,2</sup>, Ulrich Siler<sup>1,2\*</sup> and Janine Reichenbach<sup>1,2\*</sup>

<sup>1</sup> Division of Immunology, University Children's Hospital Zurich, Zurich, Switzerland

<sup>2</sup> Children's Research Centre, Zurich, Switzerland

\* Equal contribution

## Supplementary Figures

### Supplementary Figure S1

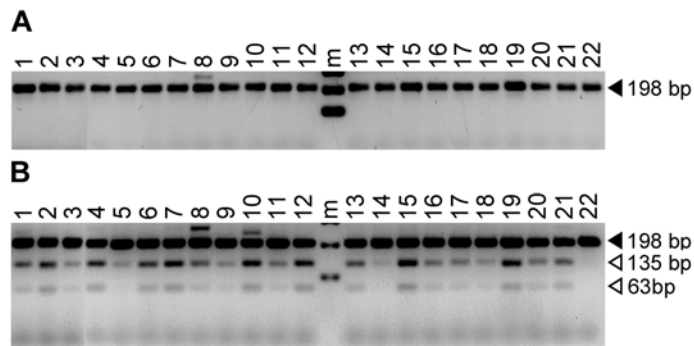

#### Restriction Fragment Length Polymorphism of single clones of CRISPR/Cas9-treated PLB-985.

PLB-985 cell line was transfected with CRISPR/Cas9 GFP co-expression plasmid and ssODN, followed by FACS sorting to monoclonality. The NCF1 gene and pseudogenes in individual clones were analyzed by restriction fragment length polymorphism. (A) Undigested PCR co-amplification products of NCF1 and its pseudogenes for all individual clones (B) Only digestion of PCR products derived from WT NCF1 sequence with BsrG1 restriction enzyme led to appearance of two bands of size 135 bp and 63 bp. Only clone 22 showed complete lack of these two bands suggesting that both alleles of NCF1 were mutated.

## Supplementary Figure S2

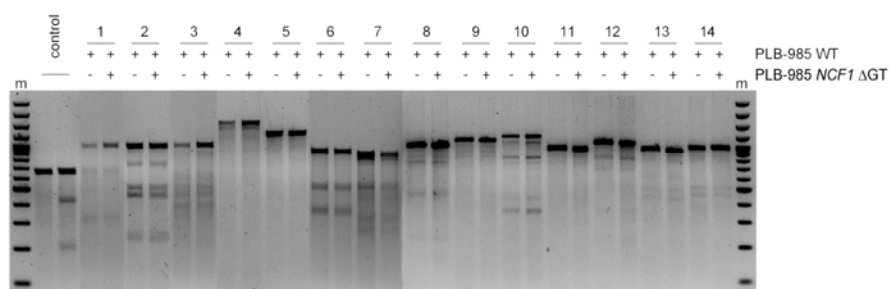

### Surveyor Assay for detection of Cas9 introduced off-target mutations.

Surveyor Assay of 14 potential off-target sites of utilized CRISPR/Cas9 sgRNA. For each analyzed site no additional cleavage was observed, indicating no off-target activity of Cas9 in the PLB-985 *NCF1* ΔGT cell line.

### Supplementary Figure S3

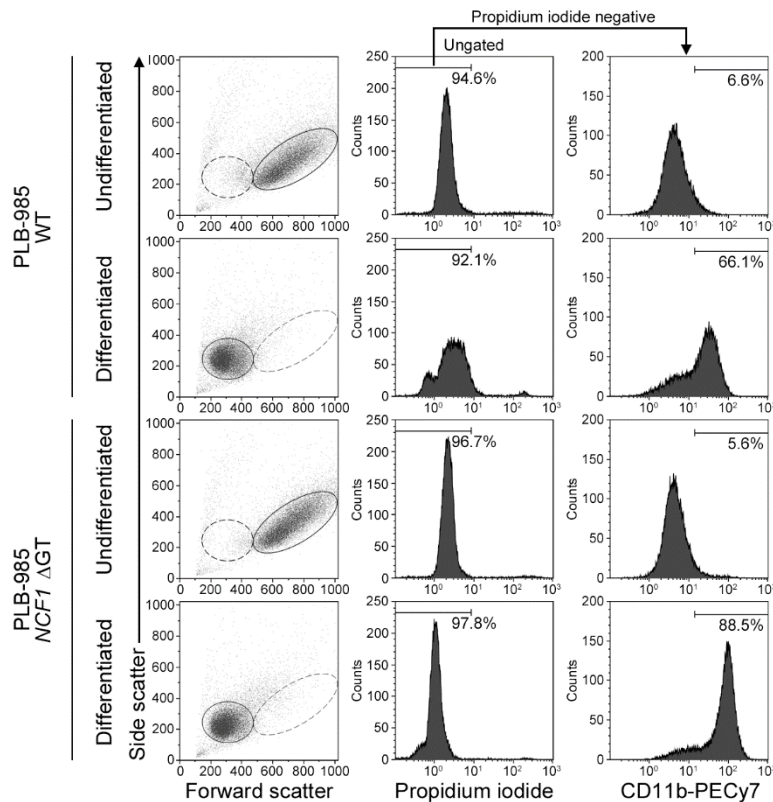

### Flow cytometry analysis of differentiation and viability of PLB-985 WT and PLB-985 *NCF1* ΔGT cells.

WT PLB-985 and PLB-985 *NCF1* ΔGT cells were differentiated to granulocytes for 6 days followed by PMA stimulation for 5 minutes. Analysis of viability and differentiation status by propidium iodide (PI) staining (1 μg/ml) in ungated cells, and CD11b surface staining of PI-negative cells. DMF-induced granulocytic differentiation of PLB-985 cells is associated with a shift in forward/side scatter distribution. No difference has been observed in forward scatter versus side scatter plot between WT PLB-985 and PLB-985 *NCF1* ΔGT cells. PI staining showed that majority of analyzed cells were viable (PI-negative: 94.6 % PLB-985 WT undifferentiated, 92.1 % PLB-985 WT differentiated, 96.7 % PLB-985 *NCF1* ΔGT undifferentiated, and 97.8 % PLB-985 *NCF1* ΔGT differentiated), whilst CD11b presentation represents differentiation status

(undifferentiated PLB-985 WT and PLB-985 *NCF1*  $\Delta$ GT: 6.5% and 5.6% CD11b-positive; differentiated PLB-985 WT and PLB-985 *NCF1*  $\Delta$ GT: 66.1% and 88.5% CD11b-positive).

## Supplementary Figure S4

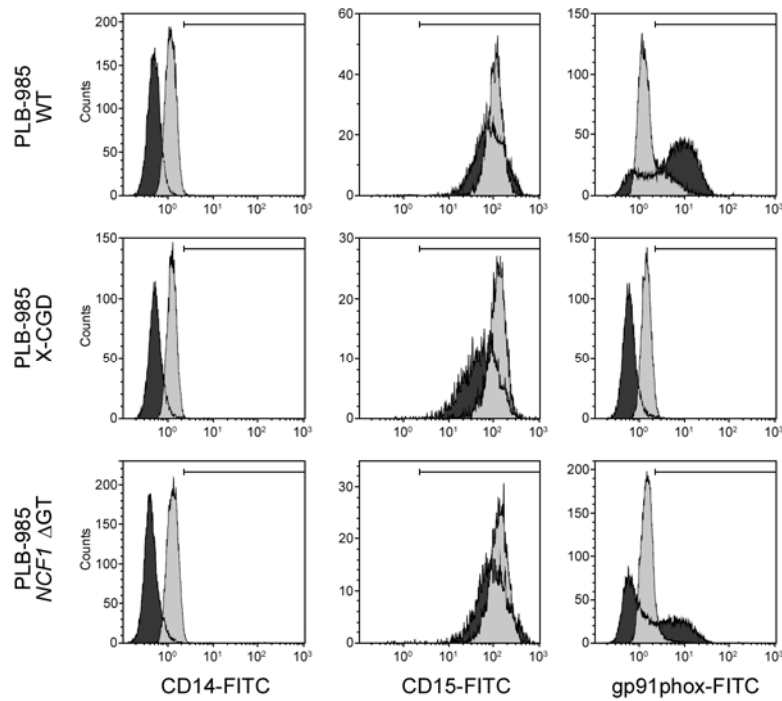

### Flow cytometry analysis of PLB-985 WT, PLB-985 X-CGD and of PLB-985 *NCF1* ΔGT cells for CD14, CD15 and gp91phox expression.

All cell lines, PLB-985 WT, PLB-985 X-CGD, and PLB-985 *NCF1* ΔGT, were CD14 negative, CD15 positive in the surface marker analysis of CD11b positive (dark), and CD11b negative (bright). Upon differentiation 72 % of PLB-985 WT and 35 % of PLB-985 *NCF1* ΔGT cells displayed gp91<sup>phox</sup> cell surface presentation.

## Supplementary Figure S5

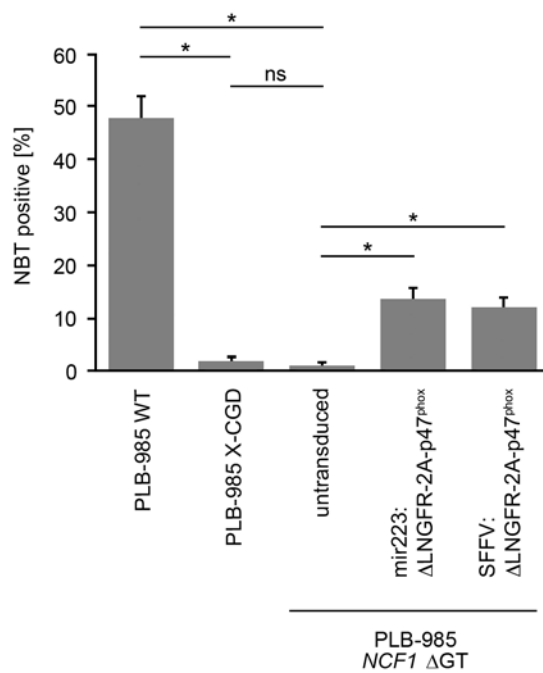

### Retroviral reconstitution of ROS production in PLB-985 *NCF1* $\Delta$ GT cells.

Percentages (+/-SD) of ROS producing cells were determined by NBT assay in untransduced WT PLB-985 and PLB-985 X-CGD as well as in transduced and untransduced PLB-985 *NCF1*  $\Delta$ GT cells upon differentiation to granulocytes (Figure 2B and E). Statistical analysis by one-way ANOVA with Tukey post hoc test was performed using SPSS software version 23. Ns:  $P > .05$ , \*:  $P < .001$ .

## Supplementary Figure S6

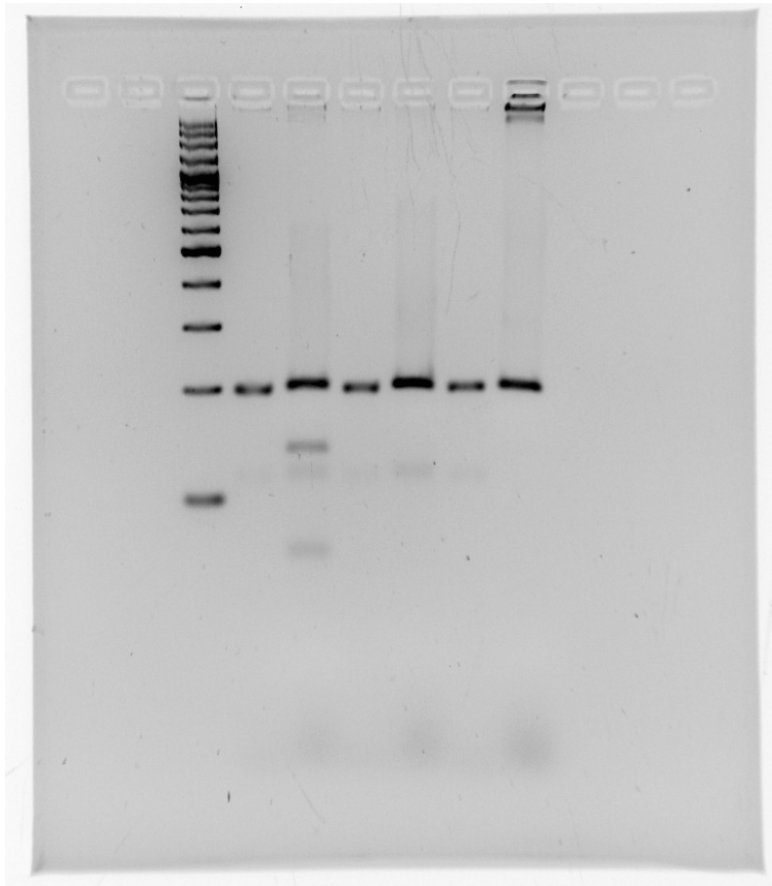

### Loss of BsrG1 restriction site in PLB-985 *NCF1* $\Delta$ GT cells

Loss of BsrG1 restriction site in PCR amplified *NCF1* (*B*, *C*) exon 2 (primers Fwd1 and Rev1 (Fig. 1B)) in PLB-985 *NCF1*  $\Delta$ GT cells. Uncropped gel corresponding to Fig. 1D.

## Supplementary Tables

### Supplementary Table S1

| <b>Generation of PLB-985 <i>NCF1</i> <math>\Delta</math>GT cell line</b> |                   |                     |
|--------------------------------------------------------------------------|-------------------|---------------------|
| PLB-985 WT cell line                                                     | Cell number       | %                   |
| Nucleofected with pPX458-NCF1                                            | $4.00 \cdot 10^6$ | 100.0               |
| Nucleofection survival                                                   | $0.48 \cdot 10^6$ | $11.8 \pm 1.7^*$    |
| GFP expressing cells                                                     | $0.09 \cdot 10^6$ | $2.3 \pm 1.0^*$     |
| Sorted monoclonal cell lines                                             | 609               | $1.5 \cdot 10^{-2}$ |
| Sorting survival                                                         | 22                | $5.5 \cdot 10^{-4}$ |
| Complete loss of BsrG1 restriction site                                  | 1                 | $2.5 \cdot 10^{-5}$ |

\* Mean of two experiments with standard deviation of the mean.

## Supplementary Table S2

| Predicted off-target sites analyzed by Surveyor assay |                         |       |                  |              |                  |                        |                           |                       |
|-------------------------------------------------------|-------------------------|-------|------------------|--------------|------------------|------------------------|---------------------------|-----------------------|
| #                                                     | off-target sequence     | score | mismatches (MMs) | UCSC gene    | locus            | primer forward         | primer reverse            | PCR product size (bp) |
| 1                                                     | GCGCAAGATGTACATGTTCTGG  | 1.4   | 4MMs [1:3:5:8]   | NM_001190482 | chr9:-78907149   | TCTGAATCTTGGAACCCATGG  | GAGAGAAATAGGCTGAGATGATGAC | 968                   |
| 2                                                     | AGCACAGGTTTACATGTTCTAG  | 1.3   | 4MMs [1:2:4:10]  |              | chr17:+66815215  | AGGCTGGAAGGAGGTTTACT   | AGTGAGTAGCGAATGGCCAGTAA   | 938                   |
| 3                                                     | ATCCCACATGTACATGTTCCCAG | 0.9   | 4MMs [1:2:7:8]   |              | chr16:+65715259  | AGTGGTGCAGGCCTATAGTC   | AGATAATCAAAGCTGGCAGCTA    | 1049                  |
| 4                                                     | AAACCATGTGTACATGTTCCCAG | 0.9   | 4MMs [1:2:3:7]   |              | chr1:-218029946  | AATGCAGCCCAGGTCCTTTT   | GATCCCTTGACCTCGTGTCT      | 1407                  |
| 5                                                     | CCTGCACCTGTACATGTTCCCAG | 0.9   | 4MMs [3:4:7:8]   |              | chr1:+8922827    | GGGTAATATGGGAGAACTTAGC | GTTCTCCTCTGTGCTCTTGAC     | 1149                  |
| 6                                                     | TCCTCAGTTGCACATGTTCCCAG | 0.8   | 4MMs [1:4:8:11]  |              | chr21:+35670707  | GTGTGTTAAGTATTGGGTACTG | TGGCTAGAAATAATGTCTGGAA    | 957                   |
| 7                                                     | CCACAAGGACTACATGTTCTGG  | 0.8   | 4MMs [3:5:9:10]  | NM_178003    | chr9:+131899924  | AGAGAGGCCTGCTCTGGTGA   | GCAGTCACCAAGGCCAGTTAGT    | 915                   |
| 8                                                     | GCTCCAGGTTACATGTTCCCAG  | 0.7   | 4MMs [1:3:10:11] |              | chr1:+218024691  | GAGAAGGATTTCTGGAGGAAG  | CCTCCTGAAAAGGCAAATACTC    | 986                   |
| 9                                                     | CTCTCAGGTCAACATGTTCCAAG | 0.7   | 4MMs [2:4:10:11] |              | chr3:-68375635   | GTCACATAACATCTCTCAGCC  | CTTCATAAGCTTATTCAGTTCCC   | 1074                  |
| 10                                                    | CCCTCAAGTGTAGATGTTCTAG  | 0.7   | 3MMs [4:7:13]    |              | chr14:+22797496  | GTGTTTAGTCTGAGACCCACC  | GAGGTTATCTCCAGGAACT       | 1141                  |
| 11                                                    | CCTCCAGGCTGACATGTTCTAG  | 0.4   | 4MMs [3:9:10:11] | NM_153613    | chr15:-34653531  | CAGCAGCTAAACCTGTACTG   | GAATCTAGATACCTGGTCACTCT   | 903                   |
| 12                                                    | CCCAGAGCTGTACAAGTTCCCGG | 0.4   | 4MMs [4:5:8:15]  | NM_031912    | chr10:-46967666  | CACTGTGTCCTTGAAACAGGT  | CACGCTGAGGCCTGTCTTTT      | 995                   |
| 13                                                    | CGCCCAGCTGTACATGATACAGG | 0.2   | 4MMs [2:8:17:19] | NM_020845    | chr12:-123519054 | CCTGATCAGAGGCCACAATT   | AGTGATAGATACCCTACAAGCACC  | 912                   |
| 14                                                    | TCCCAGTTGTGCATGTACCCGG  | 0.2   | 4MMs [1:8:12:18] | NM_004567    | chr3:-48556455   | ACAATGTGAAAGGAAAGTGCT  | ATTACAAGTCCAGACACTTTCTGA  | 953                   |
